# Supplementary material
Source: Springer Nature journal article supplement (https://www.springermedizin.de/resource/supplementary/12889_2010_2731_MOESM1_ESM.pdf/9487466)
Supplement: MOESM1 [file 9487466]

|                             |                           |                      |
|-----------------------------|---------------------------|----------------------|
| Start of the preschool year | <b>a</b>                  | <b>b</b>             |
|                             | <b>c</b>                  | <b>d</b>             |
| Trial baseline              | <b>Randomisation</b>      |                      |
|                             | <b>Intervention group</b> | <b>Control group</b> |
| 1 month                     | <b>e</b>                  |                      |
| 6 months                    | <b>f</b>                  | <b>g</b>             |
|                             | <b>f</b>                  |                      |
| 1 year                      | <b>h</b>                  | <b>i</b>             |
|                             | <b>h</b>                  | <b>i</b>             |
| 2 year                      | <b>h</b>                  | <b>i</b>             |
|                             | <b>h</b>                  | <b>i</b>             |

|          |                                                                                                                                                                                              |
|----------|----------------------------------------------------------------------------------------------------------------------------------------------------------------------------------------------|
| <b>a</b> | <b>Screening questionnaire:</b> Preschool services distribute to parents of all children at the start of their preschool year. Parents return questionnaires via a sealed box at preschools. |
| <b>b</b> | <b>Usual care services</b> available in the community (i.e., maternal and child health, general practice, any other health, education and childcare services).                               |
| <b>c</b> | <b>Trial eligibility</b> determined by high temperamental inhibition score on screening questionnaire. Research team makes recruitment phone calls to all eligible families.                 |
| <b>d</b> | <b>Baseline questionnaire</b> and consent forms mailed to families; return by reply-paid mail                                                                                                |
| <b>e</b> | <b>Cool Little Kids program</b> is administered. 6 x 90-min group sessions (2 weekly, 3 fortnightly, 1 month booster)                                                                        |
| <b>f</b> | <b>Screening process appraisal questionnaire</b> mailed to parents; return by reply-paid mail                                                                                                |
| <b>g</b> | <b>Cool Little Kids program appraisal questionnaire</b> mailed to parents; return by reply-paid mail                                                                                         |
| <b>h</b> | <b>Primary &amp; secondary outcomes questionnaire</b> mailed to parents; return by reply-paid mail                                                                                           |
| <b>i</b> | <b>Parent telephone interview</b> to assess primary outcome                                                                                                                                  |
